1  
2  
3  
4  
5  
6  
7  
8  
9  
10  
11  
12  
13  
14  
15  
16  
17  
18

# Mind over matter: A perceptual decision bias toward filled-in stimuli in the blind spot

Benedikt V. Ehinger<sup>1</sup>, Katja Häusser<sup>1</sup>, José Ossandón<sup>\*1,2</sup>, Peter König<sup>\*1,3</sup>

<sup>1</sup> Neurobiopsychology, Institute of Cognitive Science, University of Osnabrück, Osnabrück, Germany

<sup>2</sup> Biological Psychology and Neuropsychology, University of Hamburg, Hamburg, Germany.

<sup>3</sup> Department of Neurophysiology and Pathophysiology, University Medical Center Hamburg-Eppendorf, Hamburg, Germany

\* Contributed equally

Correspondence: Benedikt V. Ehinger, Neurobiopsychology, Institute of Cognitive Science, University of Osnabrück, Albrechtstraße 28, Osnabrück, 49069, Germany - behinger@uos.de

## Author Contributions

BE, JO and PK designed the study. BE and KH recorded and analyzed the data. BE, JO and PK wrote and revised the manuscript.

## 19 **ABSTRACT**

20 Modern theories of cognition place an emphasis on the (un)certainty of available  
21 information. This raises the question whether we trust more external sampled information or  
22 internal inference processes. The specific properties of visual processing around the blind spot  
23 region allow us to address this. Although there are no photoreceptors corresponding to the  
24 physiological blind spots, we experience visual content there as if it were veridical, when it is in  
25 fact only “filled in” based on the surroundings. We asked subjects to choose between a stimulus  
26 partially presented in the blind spot that elicits fill-in and another at the same eccentricity outside  
27 of the blind spot. Subjects displayed a systematic bias toward the blind spot stimulus, where the  
28 filled-in part could have actually concealed a non-target. Two control experiments confirmed this  
29 finding and demonstrate that this is not an effect of eccentricity, but a property of the filling in  
30 process. This intuitively puzzling effect finds a straightforward explanation within the context of  
31 predictive coding. The filled-in signals are produced by the brain’s generative model based on  
32 spatial-context priors. In contrast to other locations, predictions at the blind spot cannot be  
33 compared to feed-forwards inputs and therefore no error signal is generated. As a consequence,  
34 the error measure for the inferred percepts reaches the lower bound and are estimated as more  
35 reliable than actually seen contents. This experiment gives credibility to the interpretation of  
36 bottom-up signals not as conveying independent information about the world, but information  
37 relating to deviations of internal expectations.

38

## 39 **SIGNIFICANCE**

40 The common view treats visual processing as a hierarchy of increasingly refined  
41 representations of external stimuli. In contrast, predictive coding interprets bottom-up relayed  
42 information as error signals, indicating deviations from internal predictions. The validity of this  
43 view is not easy to test. Here we utilize the phenomenon of fill-in in physiological blind spot region  
44 to compare internally generated against veridical percepts. We demonstrate, that in the absence

45 of bottom-up signals an internally constructed percept is assigned a reduced uncertainty  
46 compared to an identical percept based on actual external input. This finding supports the  
47 framework of predictive coding: the filled in percept has smaller prediction errors and therefore is  
48 selected as the more reliable stimulus.

49

50

## 51 INTRODUCTION

52 In order to make optimal and adaptive decisions, animals integrate multiple sources of sensory  
53 information. This is especially important in conditions of uncertainty when information from a  
54 single sensory modality would be otherwise insufficient. For example, when animals are  
55 confronted with weakly coherent stimuli during random-dot motion experiments, their  
56 performance and corresponding neural activity vary proportionally to signal strength in a way that  
57 is consistent with the progressive integration of evidence over time (1, 2). Crucially, sensory  
58 integration does not only operate as a temporal accumulator because it is also possible to  
59 combine information from multiple sensory sources (3–8).

60 In the case of multisensory perception, several experiments have shown that integration  
61 often occurs in a statistically optimal way. This has been best demonstrated in cue-integration  
62 experiments in which humans perform as if they were weighting the different sources of  
63 information according to their respective reliabilities (9–12). This form of statistical inference has  
64 also been demonstrated for cortical neurons of the monkey brain, with patterns of activity at the  
65 population level that are consistent with the implementation of a probabilistic population code (13,  
66 14).

67 In many of these sensory integration experiments, the perceptual reliability of different  
68 inputs is probed through quantitative manipulations of the inputs' signal-to-noise ratios (15–17).  
69 However, some percepts are unreliable not because they are corrupted by noise but because  
70 they are internally inferred and thus intrinsically uncertain. This occurs naturally in the monocular  
71 visual field at the physiological blind spot, where content is “filled in” based on information from  
72 the surroundings. In this case, no veridical percept is possible at the blind spot location. Though  
73 changes in reliability due to noise directly result in behavioral consequences, the effects of the  
74 qualitative difference between veridical and inferred percepts that are otherwise apparently  
75 identical is unknown.

76           We recently reported differences in the processing of veridical and inferred information at  
77 the level of EEG responses(18). In the present experiment, we address whether such an  
78 assessment of a dichotomous, qualitative difference in reliability is available for perceptual  
79 decision-making. Using 3D shutter glasses, we presented one stimulus partially in the  
80 participant's blind spot to elicit filling in and a second stimulus at the same eccentricity in the nasal  
81 field of view outside of the blind spot. The subject's task was to indicate which of the two stimuli  
82 was continuously striped and did not present a small orthogonal inset (see Fig. 1A). Crucially,  
83 stimuli within the blind spot are filled in and thus perceived as continuous, even when they present  
84 an inset. In the diagnostic trials, both stimuli were physically identical and continuous, and  
85 subjects were confronted with an ambiguous decision between veridical and partially inferred  
86 stimuli.

87           We evaluated two mutually exclusive hypotheses in which perceptual decision-making  
88 could proceed when confronted with an ambiguous decision between veridical and inferred  
89 percepts. In the first case, agents are unable to make perceptual decisions based on an implicit  
90 assessment of differences in reliability between stimuli that otherwise look identical. Therefore,  
91 subjects would have an equal chance of selecting stimuli presented inside or outside the blind  
92 spot. Alternatively, it might be possible to use the information about the reduced reliability of filled-  
93 in information. Therefore, we expect subjects to follow an optimal strategy and trust a stimulus  
94 presented outside the blind spot, where the complete stimulus is seen, more often than when the  
95 stimulus is presented inside the blind spot, where it is impossible to know the actual content of  
96 the filled-in part.

97

98 **RESULTS**

99 We conducted three experiments (see Fig. 1 and the methods for a detailed task description).  
100 The first experiment tested the presence of a bias against the blind spot location; the other two  
101 experiments were replications of the first experiment with additional control conditions to test the  
102 existence of biases between the nasal and temporal fields of view at locations that do not  
103 correspond with the blind spot.

104 In the first experiment, 24 subjects performed a sometimes ambiguous 2-AFC task in  
105 which they had to indicate which of the two stimuli was continuously striped instead of presenting  
106 a small orthogonal inset (Fig. 1A). The stimuli were presented simultaneously in the periphery at  
107 external locations corresponding to the blind spots (Fig. 1B, C). We used a 3D monitor and shutter  
108 glasses that allowed for controlled monocular display of the stimuli. The first experiment consisted  
109 of mixed perceptually ambiguous and unambiguous trials that we used to test the two competing  
110 hypotheses on whether the reliability assessments of these conditions differed for decision-  
111 making.

112

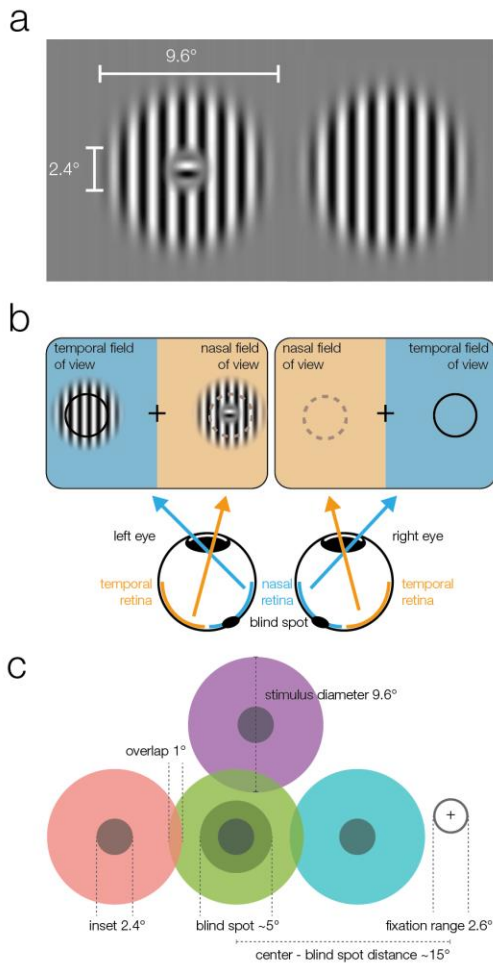

113

## 114 **Figure 1: Stimuli and stimulation**

115 **a)** Striped stimuli used in the study. The inset was set to ~50% of the average blind spot size. The  
116 global orientation of both stimuli was the same, but in different trials it could be either vertical (as  
117 shown here) or horizontal (not shown).

118

119 **b)** Two images were displayed using shutter glasses. For example, the left stimulus could be  
120 shown either in the temporal field of view (nasal retina) of the left eye (as in the plot) or in the  
121 nasal field of view (temporal retina) of the right eye (not shown). This example trial is  
122 unambiguous: The stimulus with an inset can be seen veridically and, therefore, the correct  
123 answer in this trial is to select the left stimulus.

124

125 **c)** The locations of stimulus presentation in the three experiments. All stimuli were presented  
126 relative to the individual blind spot, and the average blind spot location is shown here. All three  
127 experiments included the blind spot location (green). In the second experiment, effects at the blind  
128 spot were contrasted with a location above it (purple). In the third experiment, the contrasts were  
129 in positions located to the left or the right of the blind spot. Please note that the contrast between  
130 locations is across trials, and stimuli are presented at symmetrical positions in any given trial.

131

132 In the unambiguous trials, an orthogonal inset was present in one of the stimuli.  
133 Importantly, in these trials, the stimulus with the inset was outside the blind spot and therefore  
134 clearly visible. As expected, subjects performed with near perfect accuracy (Fig. 2, unambiguous  
135 trials), choosing the continuous stimulus in an average of 98.8% of trials (95%-quantile [96.4%–  
136 100%]).

137  
138 There were two types of ambiguous trials. In the first type (Fig. 2, ambiguous control), one  
139 of the following applied: both stimuli were continuous and appeared outside the blind spots in the  
140 nasal visual fields (Fig. 2, line 3); both were continuous and appeared inside the blind spots (Fig.  
141 2, line 4); or one was continuous, the other had an inset, and both appeared inside the blind spots  
142 either in the left/right and right/left ones (Fig. 2, lines 5 and 6). The central parts of the stimuli,  
143 where the insets could appear, were perfectly centered inside the blind spot when presented (Fig.  
144 1A). These stimuli were thus perceived as continuous due to filling in of the surrounding visible  
145 part of the stimuli. Thus, in all four versions, subjects perceived two identical stimuli, and there  
146 was no single correct answer. In this type of ambiguous trial, subjects showed a small global  
147 leftward bias and chose the left stimulus in 53.6% of trials (Fig. 2, dashed line). In addition, no  
148 difference can be seen between the perception of pairs of filled-in stimuli and pairs of veridical  
149 continuous stimuli (Fig. 2, line 3 vs. 4-6). This type of ambiguous control trial clearly shows that  
150 fill-in is perfect in our experiment.



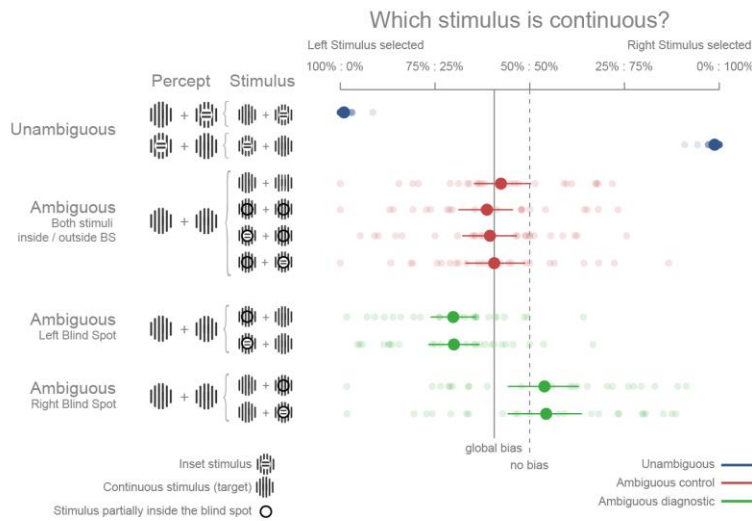

151

152 **Figure 2: First experiment**

153 In the first column, the percept of the subjects and the actual stimulation is contrasted. Stimuli  
 154 containing a dark-line circle were presented in the blind spot, and thus an inset stimulus is  
 155 perceived as a continuous stimulus. In the graph, the average response of each subject (n=24),  
 156 and the group average with 95% bootstrapped CI are shown. The unambiguous trials show that  
 157 the subjects were almost perfect in their selection of the continuous stimulus (blue). For the  
 158 ambiguous control trials (red), both stimuli were presented either outside or inside the blind spot.  
 159 Here only a global bias toward the left stimulus can be observed (solid line, the mean across all  
 160 observed conditions). Note that the performance of presenting an inset in the blind spot is identical  
 161 to presenting a continuous stimulus in the blind spot. The ambiguous diagnostic conditions  
 162 (green) show the bias toward the blind spot for either side.  
 163

164 The second type of perceptually ambiguous trial allowed us to directly address our  
 165 hypotheses. Here, the important manipulation is that we can show stimuli at symmetrical  
 166 locations, with one inside and the other outside the blind spot (Fig. 2, ambiguous diagnostic). This  
 167 allowed us to test whether subjects show a bias against the stimulus that is partially inferred (inset  
 168 area inside the blind spot) and in favor of the veridical stimulus (in the opposite visual field). Note  
 169 here, that selecting the filled-in stimulus is a sub-optimal decision: the stimulus presented partially  
 170 in the blind spot is the only one who could possibly contain the inset. This is explicit in the cases  
 171 where an inset is shown in the blind spot but rendered invisible by fill-in (Fig.2, line 8 and 10). For  
 172 analysis, we modeled the probability increase of choosing the right stimulus with predictors if the  
 173 right stimulus was presented in either the temporal visual field of the right eye (blind spot) or the

174 nasal visual field of the left eye (non-blind spot), a similar factor was used for the left stimulus.  
175 Consequently, the two one-sided model estimates were collapsed to a single measure.

176 Figure 2 (ambiguous diagnostic) shows that subjects indeed presented a bias. However,  
177 in contrast to our expectations, subjects were more likely to choose the filled-in percept (15.01%,  
178  $CDI_{95}$  8.49%–21.08%). In other words, when subjects had to decide which of the two stimuli (both  
179 perceived as being continuous, and in most cases actually physically identical) was less likely to  
180 contain an inset, they showed a bias for the one in which the critical information was not sensed  
181 but inferred. Remarkably, this result is at odds with both of the experimental predictions that  
182 postulated a bias in favor of the veridical stimulus or no bias.

183 In the second experiment, we focused on replicating the unexpected result of experiment  
184 1 and evaluating whether the blind spot bias observed was due to systematic differences between  
185 nasal and temporal retinae. In experiment 1, we presented stimuli at mirror eccentricities inside  
186 and outside the blind spot. Therefore, we had to present them to opposite sides of one eye's  
187 retina (temporal and nasal respectively; see Fig. 1B). Otherwise, the stimuli would have appeared  
188 at the same external coordinates and led to binocular rivalry(19). In experiment 2, we tested  
189 whether the bias in experiment 1 was unspecific to the blind spot location but related to known  
190 differences between the temporal and nasal retina (for a review, see (20)). There is higher  
191 photoreceptor density(21), spatial resolution(22), luminance discrimination(23) and orientation  
192 discrimination(24) at locations that project to the nasal retina (the temporal visual field where the  
193 blind spots are located). Thus, we repeated our experiment with a new group of subjects ( $n=27$ )  
194 and an additional condition. In this new condition, the two stimuli were displayed at symmetrical  
195 locations above the blind spot ( $25^\circ$  above the horizontal meridian; see Fig. 1C). The results of this  
196 second experiment (Fig. 3A triangles, Fig. 3B for model parameters) replicate the previous  
197 observations of experiment 1. Subjects showed a bias for selecting the stimulus presented inside the  
198 blind spot (12.5%,  $CDI_{95}$  7.35%–17.49%). However, we also found a bias in the control condition  
199 toward the stimuli presented in the temporal visual field above the blind spot (6.63%,  $CDI_{95}$  0.77%–

200 12.3%). The bias was nevertheless stronger inside the blind spot (paired-diff: 6.11%,  $CDI_{95}$  1.16%–  
201 10.78%). In summary, on top of the bias inside of the blind spot area, we observed that subjects  
202 also showed an additional, smaller bias for stimuli presented to the nasal retina (temporal visual  
203 field).

204 We performed an additional third experiment on a new group of subjects (n=24). Here, we  
205 compared biases in the blind spot to two other control conditions flanking the blind spot region  
206 from either left or right (Fig. 3A squares). The blind spot location again revealed the strongest effect  
207 (13.18%  $CDI_{95}$  6.47%–19.64%), while the locations inwards and outwards resulted in a 2.85% and  
208 4.8% bias, respectively, for the temporal visual field ( $CDI_{95}$  -1.1%–6.65%;  $CDI_{95}$  0.58%–8.89%). The  
209 bias of both control locations was different from the bias of the blind spot location (inward vs. BS:  
210 10.51%,  $CDI_{95}$  3.55%–17.29%; outward vs. BS: 8.61%,  $CDI_{95}$  0.98%–16.04%). In this experiment, as  
211 in experiments 1 and 2, we observed a bias specific to the blind spot region.

212

213

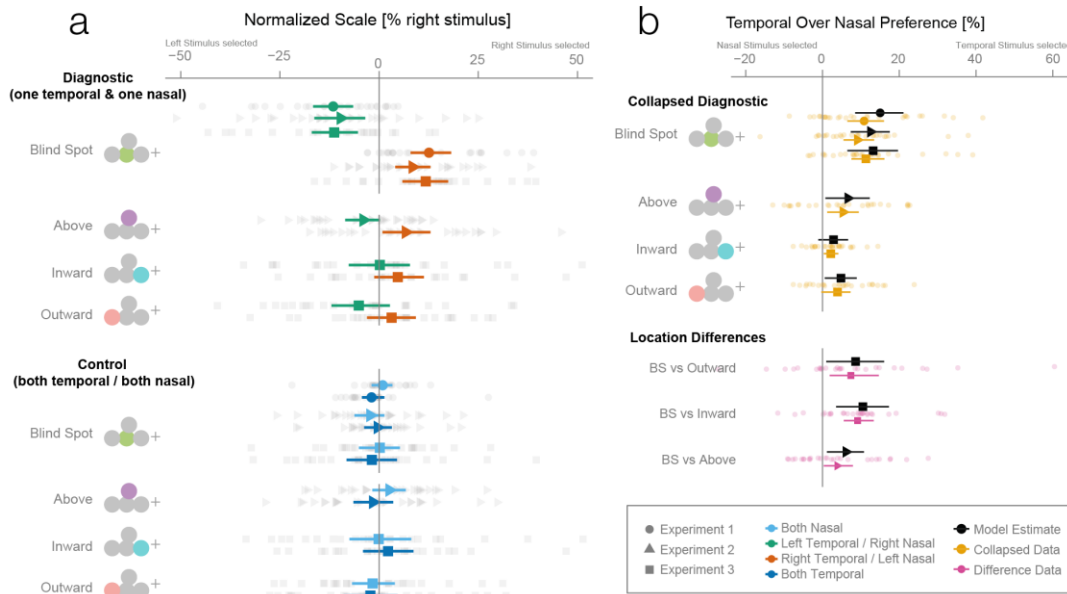

214

215 **Figure 3: All experiments**

216 **a)** Fraction of choosing the right stimulus dependent on location (indicated by icon) and  
 217 experiment (Exp. 1: n=24, Exp. 2: n=27, Exp. 3: n=24). For plotting purposes we preprocessed  
 218 the data by subtracting the global bias. Each gray dot depicts one subject. The error bars depict  
 219 mean and 95% bootstrapped CI. A bias for the blind spot was visible in the form of “left” responses  
 220 when the left stimulus was presented in the temporal visual field of the left eye (green, nasal /  
 221 blind spot retina of the left eye) and of more “right” responses when the right stimulus was  
 222 presented in the temporal visual field of the right eye (green, nasal / blind spot of the right eye) in  
 223 all experiments. A bias was visible in the other tested locations, but it was much smaller. Control  
 224 conditions show that there was no bias if the stimuli were shown either both inside the temporal  
 225 fields (dark blue) or both inside the nasal fields (light blue).  
 226

227 **b)** Yellow color indicates combined data over the left and right side. Black color indicates the  
 228 posterior 95% credibility interval of a logistic mixed linear model. A bias for the blind spot stimulus  
 229 was clearly evident in all experiments. A much weaker effect was present in the other tested  
 230 locations. The within-subject differences between the blind spot and the other locations are  
 231 depicted in purple, and the respective modeled difference is shown in black.  
 232

233

234 A bias for the temporal visual field, especially the blind spot, can also be reflected in the  
 235 distribution of reaction times. We compared the reaction times of trials where subjects selected a

236 stimulus in the temporal visual field against trials where the stimulus in the nasal visual field was  
237 selected. No prior hypotheses were formulated for the reaction time. Thus, in contrast to the other  
238 analyses presented here, these are explorative. We observed an average reaction time of 637  
239 ms (minimum subject average: 394 ms, maximum 964 ms) in the first experiment (Fig. 4A). We  
240 used a linear mixed model to estimate the reaction time difference for selecting a stimulus  
241 presented inside the blind spot (temporally) against one outside the blind spot (nasally). In the  
242 first experiment (Fig. 4B), after excluding three outliers, we observed this effect with a median  
243 posterior effect size of 13 ms ( $CDI_{95\%}$  2–42 ms) faster reaction times when selecting the blind  
244 spot region. The three outliers (marked red in Fig. 4) were identified visually and removed because  
245 they were distinctively different from the rest of the population. The mean of the outliers was 5.2  
246 SD away from the remaining subjects. The outliers were nevertheless in the direction of the  
247 reaction time effect and did not change its significance (with outliers, 63 ms,  $CDI_{95}$  7–124 ms).  
248 However, faster reaction times while selecting the blind spot stimulus were not present in the  
249 other two experiments. The nominal differences were in the same direction as experiment 1 but  
250 comparably small and insignificant (4 ms,  $CDI_{95}$  -14–23 ms; and 22 ms,  $CDI_{95}$  -13–57 ms). Similar  
251 results were obtained for the other locations tested (above: 8 ms,  $CDI_{95}$  -38–53 ms; outward: 2  
252 ms  $CDI_{95}$  -13–16 ms; inward: 4 ms,  $CDI_{95}$  -29–37 ms). Furthermore, an analysis of the combined  
253 data shows no evidence for a reaction time effect in any location, and the blind spot estimate  
254 changes here to 12 ms ( $CDI_{95}$  -23–47 ms). Even though the signs of all three experiments indicate  
255 that the reaction time for nasal stimuli is slower than for temporal ones despite the large total  
256 number of subjects ( $n=75$ ), the results of our experiments remain inconclusive on this issue.

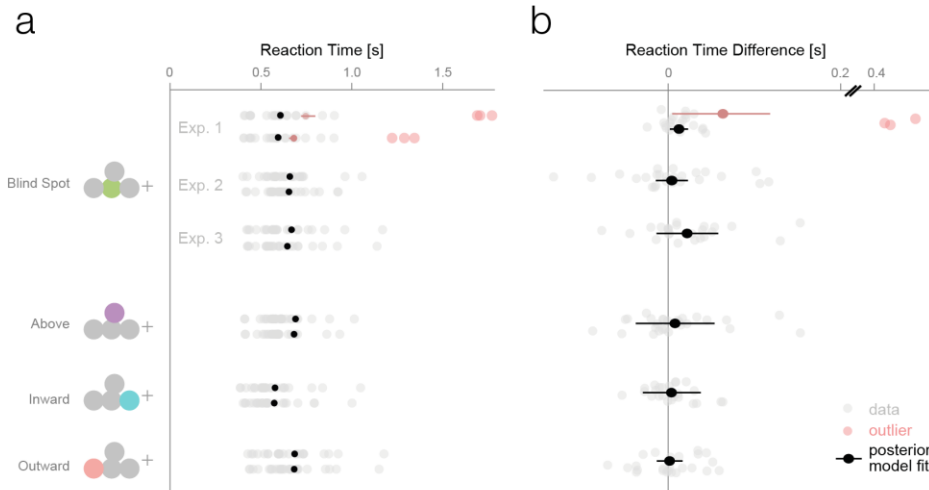

257

#### 258 **Figure 4: Reaction Times**

259 **a)** Reaction times of nasal chosen trials (upper row of each pair) and temporal chosen trials (lower  
260 row of each pair). Black dots indicate the average reaction time across subjects with 95%  
261 bootstrapped CI (in A too small to display). Red circles depict the removed outliers and the mean  
262 with the outliers included.

263  
264 **b)** Nasal chosen minus temporal chosen reaction times. The summary statistics depict the 95%  
265 CDI of the posterior effect estimate. We observe a bias in the first experiment and the blind spot  
266 with and without the outlier, but not in the other experiments or conditions.

267

268

269 For an overview of all experiments and the results of a logistic model that combines all  
270 selection-bias experiments, see Table 1 of the Appendix. In the combined model, we did not find any  
271 differences between the temporal field effects at locations other than the blind spots. In other  
272 words, the temporal field effects of the locations inwards, outwards and above were not different  
273 from each other. For the sake of clarity, we combined these location levels. Keeping everything  
274 else constant, we expect that if we present one stimulus in the blind spot against the equidistant  
275 nasal location, we are 13.44%  $CDI_{95}$  9.94%–16.70% more likely to choose the stimulus in the  
276 blind spot. This bias is stronger than the effect observed elsewhere in the temporal field by 8.89%  
277  $CDI_{95}$  5.01%–12.53. In summary, subjects showed a robust bias for the blind spot locations that  
278 could not be explained by a non-specific bias for the temporal visual field. In the case of this task,

279 when confronted with an ambiguous choice between veridical and inferred sensory information,

280 human subjects showed a suboptimal bias for inferred information.

281

## 282 **DISCUSSION**

283 In three experiments, we showed that when confronted with identical physical stimulation in a  
284 simple decision task, subjects biased their decisions toward stimuli in the temporal field of view.  
285 Importantly, subjects showed a consistent bias for blind spot inferred percepts, which was  
286 stronger than the bias at any other location in the temporal visual field.

287 Why do subjects choose the blind spot location when it is objectively the least reliable?  
288 Our interpretation takes the results at face value: subjects must possess at least implicit  
289 information about whether a percept originates from the blind spot in order to show a bias for it.  
290 At the same time, the veridical information from the other stimulus is also available. This indicates,  
291 that at least for the task presented here, perceptual decision-making can rely more on inferred  
292 than veridical information, even when there is knowledge in the system about the nature of this  
293 signal and its reduced reliability as a consequence. Thus, a suboptimal decision is made.

294 In the following, we propose two possible explanations for this effect. The first explains the  
295 effect simply by stating that the blind spot is 'special' because the information around the optic  
296 disc is sampled differently. The second explanation is based on the general notion of predictive  
297 coding: the reduced noise in the inferred percept reduces the bottom-up prediction error.

298 In the results section, we introduced the evidence for psychophysical differences between  
299 the nasal and temporal visual field, which motivated the control experiments. In the same vein,  
300 the parts of the retina surrounding the optic disc might present further enhancements for  
301 perception that are useful for a better estimation of the contents of the blind spot area. That means  
302 that subjects could perceive the stimulus as more veridical due to enhanced sensory perception  
303 at the boundary of the blind spot. Some weak evidence for this has been reported that indicates  
304 better disparity estimates (Vernier task) in the peri-blind spot area compared to equally eccentric  
305 locations in the nasal visual field. This effect seems to happen only when the element extends  
306 into the blind spot and thus produces filling in and not for other filling in processes derived from



307 pathological scotomas (25). This would indicate that the low-level, bottom-up information gained  
308 from the blind spot is superior to the veridical input of other retinal origin.

309 Our alternative explanation is based on the framework of predictive coding (26–28). For  
310 this task, we assume that predictive coding could work both as a way of predicting future sensory  
311 input (task context) and static predictions based on spatial context (the filling-in). Similar spatial  
312 context predictions have recently be found for illusionary figures in human V1 using high-field  
313 fMRI (29). In our task, this would mean that subjects generated predictions of continuous stimuli  
314 in the ambiguous trials. The predicted sensory input was then compared to the incoming sensory  
315 input, and an error signal representing the mismatch was returned. The filled-in signal might have  
316 had less perceptual noise. This was partially explained by the hypothesized integration process  
317 over boundary neurons (30) that act as smoothers and further explained by the fact that no unique  
318 perceptual noise from the senses reached the low-level visual areas near the blind spot (as there  
319 are no sensory inputs from the stimulus in the blind spot). Thus, with less noise, the inferred  
320 sensory input at the V1 blind spot location has a higher signal-to-noise ratio and will match the  
321 predicted stimulus signal better. A better match results in a smaller prediction error and thus a  
322 higher credibility at later stages. A faster reaction time to the filled-in stimulus compared to the  
323 veridical stimulus could be taken as further evidence that the integration process is indeed biased  
324 with less noise. With respect to reaction times, our experiments remain inconclusive, and further  
325 research is needed to fully support this assumption. In conclusion, predictive coding can best  
326 explain our results with the additional assumptions that the signal-to-noise ratio of the blind spot  
327 percept is higher due to the fill-in process and/or the blind spot lacking unique noise from the eye.

328 In a recent EEG study with human subjects, we demonstrated that a qualitative reliability  
329 assessment exists at the neural level in the form of low- and high-level trans-saccadic predictions  
330 of visual content (18). Notably, active predictions of visual content differed between inferred and  
331 veridical visual information presented inside or outside the blind spot, respectively. We could not  
332 find differences between low-level error signals, but high-level error signals differed markedly. We

333 concluded that the inferred content is processed as *if* it were veridical for the visual system, but  
334 knowledge of its reduced precision is nevertheless preserved at later processing stages. Thus,  
335 only an absence of a bias for the veridical peripheral stimulus could have been explained by this  
336 finding of early as *if* veridical processing. The participants in the EEG study were a subset of the  
337 subjects of experiment 1 and thus the same subjects who showed activity congruent with a  
338 differential processing of filled-in and veridical inputs. They nevertheless choose the unreliable,  
339 filled-in stimulus in this perceptual decision-making task. In other words, the implicit knowledge  
340 that a filled-in stimulus is less reliable seems to be unavailable for perceptual decision-making.

341 In conclusion, we find a new behavioral effect where subjects reliably prefer a partially  
342 inferred stimulus over a veridical one. Though both appear to be continuous, the filled-in one could  
343 hide an inset and is therefore less reliable. In this perceptual decision-making task, in contrast to  
344 predictions about future content over saccades, subjects do not make use of high-level  
345 assessments about the reliability of the filled-in stimulus. Even more so, they prefer the unreliable  
346 percept, possibly due to physiologically superior signal extraction, less noise accumulation or  
347 both.

348

349 **METHODS**

350 Many of the methods are taken from Ehinger et al. 2015. All data and analyses are available at  
351 <https://osf.io/wphbd> .

352

353 **Subjects:**

354 Overall, 136 subjects took part in the experiments. Of the subjects, 33% (n=45) were removed due to  
355 the screening experiments described below. An additional 4% (n=6) were removed due to low  
356 performance ([n=2, <75%] in at least two conditions with a visible unique inset) or because they  
357 responded to the stimuli with the inset stimulus instead of the continuous stimulus (n=4). The  
358 experimental data were not recorded in 7% (n=10) due to eye tracking calibration problems (n=3) and  
359 other issues during data collection (n=7). The remaining 75 subjects were recorded and analyzed in  
360 the following experiments.

361 For the first experiment, we analyzed the data of 24 subjects (average age 21.9 years, age  
362 range 18–28 years, 12 female, 20 right-handed, 16 right-eye dominant) with a subset of 15 taking part  
363 in the EEG study of Ehinger et al. In the second experiment, we analyzed the data of 27 subjects  
364 (average age 22.4 years, age range 19–33 years, 15 female, 25 right-handed, 19 right-eye dominant).  
365 In the third, 24 subjects (average age 21.9 years, range 19–27 years, 19 female, 23 right-handed, 16  
366 right-eye dominant).

367 All subjects gave written informed consent, and the experiment was approved by the local  
368 ethics committee. We disclose that in the second experiment, we planned to record 18 subjects,  
369 but the results of the initial analysis with this first group were not conclusive about differences  
370 between the location inside and the location above the blind spot. Therefore, we decided to  
371 increase the number of subjects by 50% (n=9).

372 **Screening:**

373 As described above, many subjects failed a simple screening test. In this pre-experiment,  
374 we showed a single stimulus in the periphery either inside or outside the blind spot in the left or  
375 right visual field. In two blocks of 48 trials, subjects indicated which stimulus (no inset vs. inset)  
376 had been perceived. We thought of this simple experiment to evaluate our blind spot calibration  
377 method, as an inset stimulus inside the blind spot should have been reported as no inset. The  
378 first block was used as a training block. In the second block, we evaluated the performance in a  
379 conservative way. If the performance was below 95% (three errors or more), we aborted the  
380 session because the participant was deemed to be too unreliable to proceed further with our  
381 experiment. Later analysis suggested that the errors of those subjects were unrelated to the blind  
382 spot. There was no clear pattern among subjects in terms of eye-lateralization or location (i.e.,  
383 inside vs. outside). In most cases the low performance was probably due to inattention. Overall,  
384 about 66% (n=75) of recruited subjects passed this test and were admitted to subsequent  
385 experiments.

386

### 387 **Eye Tracking, Screen, Shutter Glasses**

388 A remote, infrared eye-tracking device (Eyelink 1000, SR Research) with a 500 Hz sampling rate  
389 was used. The average calibration error was kept below  $0.5^\circ$  with a maximal calibration error of  
390  $1.0^\circ$ . Trials with a fixation deviation of  $2.6^\circ$  from the fixation point were aborted. We used a 24-  
391 inch, 120 Hz monitor (XL2420t, BenQ) with a resolution of 1920x1080 pixels in combination with  
392 consumer-grade shutter glasses for monocular stimulus presentation (3D Vision, Nvidia, wired  
393 version). The shutter glasses were evaluated for appropriate crosstalk/ghosting using a custom-  
394 manufactured luminance sensor sampling at 20 kHz. The measured crosstalk at full luminance  
395 was 3.94%. The subject screen distance was 60cm in the first two experiments and 50cm in the  
396 third experiment.

397

### 398 **Stimuli**

399 Modified Gabor patches with a frequency of 0.89 cycles/° and a diameter of 9.6° were generated.  
400 Two kinds of patterns were used (Fig. 1A): one completely continuous and one with a small  
401 perpendicular inset of 2.4°. For comparison, the blind spot typically has a diameter of 4°–5°. The  
402 Gabor had constant contrast in a radius of 6.3° around the center. This ensured the same  
403 perception of the continuous stimulus outside the blind spot in comparison to a filled-in stimulus,  
404 where the inner part is inside the blind spot. To account for possible adaptation effects, horizontal  
405 and vertical stimuli were used in a balanced and randomized way across the trials. Stimuli were  
406 displayed using the Psychophysics Toolbox (31) and Eyelink Toolbox (32). The stimuli were  
407 displayed centered at the individually calibrated blind spot location. The stimulus at the location  
408 above the blind spot in experiment 2 was at the same distance as the blind spot but was rotated  
409 by 25° to the horizon around the fixation cross. For the inward and outward condition of  
410 experiment 3, stimuli were moved nasally or temporally by 8.6°, thus the stimuli had an overlap  
411 of only 1°. Less overlap is not possible without either cutting the border of the screen or  
412 overlapping with the fixation cross.

413

#### 414 **Task**

415 After a fixation period of 500 ms, we presented two stimuli simultaneously in the left and right  
416 peripheries. Subjects were instructed to indicate via button press (left or right) which stimulus was  
417 continuous. Each stimulus was presented either in the temporal or nasal field of view. In some  
418 trials, the required response was unambiguous, when one of the stimuli showed an inset and the  
419 other did not (and at least the inset stimulus was presented outside the blind spot). In many trials  
420 (80% of all experiments and locations, 46% when the stimulus was shown above the blind spot  
421 in experiment 2), both stimuli were continuous and no unique correct answer existed. All trials  
422 were presented in a randomized order. If the subject had not given an answer after 10 seconds,  
423 the trial was discarded and the next trial started. All in all, subjects answered 720 trials over 6  
424 blocks; in experiment 1 the trials were split up into two sessions. After each block the eye tracker

425 and the blind spot were re-calibrated. After cleaning trials for fixation deviation and blinks, an average  
426 of 498 trials (90%-quantile: 402, 567) remained. For two subjects, only 360 trials could be recorded.

427

## 428 **Blind Spots**

429 In order to calibrate their blind spots, subjects were instructed to use the keyboard to move a  
430 circular monocular probe on the monitor and to adjust the size and location to fill the blind spot  
431 with the maximal size. They were explicitly instructed to calibrate it as small as necessary to  
432 preclude any residual flickering. The circular probe flickered from dark gray to light gray to be  
433 more salient than a probe with constant color (33). All stimuli were presented centered at the  
434 respective calibrated blind spot location. In total, each subject calibrated the blind spot six times.  
435 For the following comparisons of blind spot characteristics we evaluated one-sample tests with  
436 the percentile bootstrap method (10,000 resamples) of trimmed means (20%) with  $\alpha = 0.05$   
437 (34). For paired two-sample data, we used the same procedure on the difference scores. We  
438 used bias-corrected, accelerated 95% bootstrapped confidence intervals of the trimmed mean  
439 (20%). In line with previous studies (18, 35), the left and right blind spots were located horizontally  
440 at  $-15.48^\circ$  (SD=0.49° CI:[-15.68°, -15.30°]) and  $15.8^\circ$  (SD=0.56° CI:[15.59°, 16.02°]) from the fixation  
441 cross. The mean calibrated diameter was  $4.92^\circ$  (SD=0.43° CI:[4.76°, 5.08°]) for the left and  $5.13^\circ$   
442 (SD=0.4° CI:[4.98°, 5.29°]) for the right blind spot. Blind spots did significantly differ in size ( $p < 0.001$ ,  
443 CI:[-0.26°, -0.08°]) and in absolute horizontal position (in relation to the fixation cross;  $p < 0.001$ ,  
444 CI:[0.21°, 0.43°]); on average, the right blind spot was  $0.32^\circ$  further outside of the fixation cross. No  
445 significant difference was found in the vertical direction ( $p = 0.86$ ), but this is likely due to the oval shape  
446 of the blind spot in this dimension and the usage of a circle to probe the blind spot. These effects  
447 seem small, did not affect the purpose of the experiments and will not be discussed further.

448

## 449 **GLMM Analysis**

450 We fitted a Bayesian logistic mixed-effects model predicting the probability of responding “right”  
451 with multiple factors that represent the temporal over nasal bias and several other covariates  
452 described below. Because we were interested in the bias between the nasal fields and the  
453 temporal fields of view, we combined both predictors for the left and right temporal (and nasal,  
454 respectively) locations and reported the combined value.

455 Data were analyzed using a hierarchical logistic mixed effects models fitted by the No-U-  
456 Turn Sampler (NUTS, STAN Development Team). The model specification was based on an  
457 implementation by Sorensen and Vasisth (36). In the results section we report estimates of linear  
458 models with the appropriate parameters fitted on data of each experiment independently. We also  
459 analyzed all data in one combined model: there were no substantial differences between the  
460 results from the combined model and the respective submodels (Appendix table 1). The models  
461 are defined as follows using the Wilkinson notation:

462

463  $answer_{right} \sim 1 + Temporal_{Left} * Location + Temporal_{Right} * Location + Answer_{right}(t - 1) +$

464  $Handedness_{Right} + DominantEye_{right} +$

465  $(1 + Temporal_{Left} * Location + Temporal_{Right} * Location + Answer_{right}(t - 1) | Subject)$

466  $Answer_{i_{right}} \sim Bernoulli(\theta_i)$

467  $\theta_i = \text{logit}^{-1}(X_{within}\beta_{within} + X_{between}\beta_{between} + N(0, \tau X_{within}) + N(0, e))$

468 Two factors were between subjects: *handedness* and *dominant eye*. In total, we have four  
469 within-subject factors, resulting in eight parameters: There are two main factors representing  
470 whether the left, and respectively the right, stimulus was inside or outside the *temporal* field.  
471 Depending on the experiment, the main factor *location* had up to three levels: the stimuli were  
472 presented outwards (3rd experiment), inwards (3rd), above (2nd) or on (1st, 2nd, 3rd) the blind  
473 spot. In addition, we modeled the interactions between location and whether the left stimulus (and  
474 the right stimulus, respectively) was shown temporally. In order to assure independence of  
475 observation, an additional within-subject main factor *answer(t-1)* was introduced, which models

476 the current answer based on the previous one. In frequentist linear modeling terms, all within-  
477 subject effects were modeled using random slopes clustered by subject and a random intercept  
478 for the subjects. We used treatment coding for all factors and interpreted the coefficients  
479 accordingly.

480 In the model we estimated the left and right temporal field effects separately. For the  
481 statistical analysis, we combined these estimates by inverting the left temporal effect and  
482 averaging with the right temporal effect. We did this for all samples of the mcmc-chain and then  
483 took the median value. We then transformed these values to the probability domain using the  
484 invlogit function, subtracting the values from 0.5 and multiplying by 100. All results were still in  
485 the linear range of the logit function. We calculated 95% credible intervals the same way and  
486 reported them as parameter estimates ( $CDI_{95}$  lower-upper) in the text. These transformed values  
487 represent the additive probability (in %) of choosing a left (right) stimulus that is shown in the left  
488 (right) temporal field of view compared to presenting the left (right) stimulus in the nasal field of  
489 view, keeping all other factors constant.

490

### 491 **Reaction Times**

492 Initially, we did not plan to analyze the reaction time data. These analyses are purely explorative.  
493 Our setup consisted of a consumer keyboard, thus delays and jitters are to be expected. But with  
494 an average of 498 trials per subject, we did not expect a bias between conditions from jitter in our  
495 analyses. Our reaction time data were analyzed with a simple Bayesian mixed linear model:

496

$$497 \quad RT \sim 1 + Temporal_{selected} * Location + (1 + Temporal_{selected} * Location |subject)$$

498

499 Only trials without a visible inset stimulus were used. *Temporal selected* consists of all trials where  
500 a temporal stimulus was selected. Because of the bias described in the results, there is a slight



501 imbalance in the number of trials between the two conditions: 234.9 CI:[228.5, 241.3] for the nasal  
502 selection and 263.1 CI:[257.5, 269.4] for the temporal selection.

503

#### 504 **Bayesian Fit:**

505 We did not make use of prior information in the analysis of our data. We placed implicit, improper,  
506 uniform priors from negative to positive infinity on the mean and 0 to infinity for the standard  
507 deviations of our parameters, the default priors of STAN. An uninformative lkj-prior ( $\nu = 2$ ) was  
508 used for the correlation matrix, slightly emphasizing the diagonal over the off-diagonal of the  
509 correlation matrix (36, 37).

510 We used six mcmc-chains using 2000 iterations each, with 50% used for the warm-up  
511 period. We visually confirmed convergence through autocorrelation functions and trace plots, then  
512 calculated the scale reduction factors (38), which indicated convergence as well ( $R_{hat} < 1.1$ ).

513

#### 514 **Effects not reported in the result section**

515 We report other effects based on a combined model over all experiments. We did not find  
516 evidence for a different global bias (main effect location) in any of the four stimulation positions  
517 tested here. Dominant eye has a 12.3% effect ( $CDI_{95}$  2.78%-21.04%) on global bias; thus subjects  
518 with a dominant right eye also preferred the right stimulus over the left one (irrespective of whether  
519 the stimulus was visible through the left or the right eye). We find a global bias (in the intercept of  
520 -27.6%  $CDI_{95}$  -40.08% - -9.66%, with treatment coding) toward choosing the left stimulus; this  
521 might reflect that in the first two experiments we instructed subjects to use the right hand, thus  
522 they used their index and middle fingers. In the third experiment we instructed subjects to use  
523 both index fingers, resulting in a decreased bias to the left, with a shift more to the right (and thus  
524 more to balanced answers) of 12.24% ( $CDI_{95}$  -1.98-24.16%).

525 We did not find evidence for a bias due to handedness (5.22%,  $CDI_{95}$  -13.12%-23.46%).

526 There was a strong influence of the previous answer on the current answer. We observe a global  
527 effect of 9.57% ( $CDI_{95}$  1.7%-17.03%), and the coding suggests that subjects are more likely to  
528 choose the right stimulus again when they have just chosen “right” in the previous trial. For this  
529 effect it is more important to look at random effect variance, which is quite high with a standard  
530 deviation of 29.9% ( $CDI_{95}$  26.28%-33.7%), suggesting that there is large variation between  
531 subjects. Indeed, a closer look at the random slopes of the effect reveals three different strategies:  
532 Some subjects tend to stick the same answer, some subjects are balanced in their answers  
533 without any trend and some subjects tend to regularly alternate their answers in each trial.

534

535 Other models we considered showed no effect when both stimuli were in the temporal field, nor  
536 any three-way interaction. In order to simplify the final model, we removed these effects from  
537 future fits.

538

539

## 540 REFERENCES

- 541 1. Shadlen M, Britten K, Newsome W, Movshon J (1996) A computational analysis of the  
542 relationship between neuronal and behavioral responses to visual motion. *J Neurosci*  
543 16(4):1486–1510.
- 544 2. Shadlen MN, Newsome WT (2001) Neural basis of a perceptual decision in the parietal  
545 cortex (area LIP) of the rhesus monkey. *J Neurophysiol* 86(4):1916–1936.
- 546 3. Wahn B, König P (2016) Attentional resource allocation in visuotactile processing  
547 depends on the task, but optimal visuotactile integration does not depend on attentional  
548 resources. *Front Integr Neurosci* 10:13.
- 549 4. Wahn B, König P (2015) Audition and vision share spatial attentional resources, yet  
550 attentional load does not disrupt audiovisual integration. *Front Psychol* 6:1084.
- 551 5. Wahn B, König P (2015) Vision and haptics share spatial attentional resources and  
552 visuotactile integration is not affected by high attentional load. *Multisens Res* 28(3-  
553 4):371–392.
- 554 6. Quigley C, Onat S, Harding S, Cooke M, König P (2008) Audio-visual integration during  
555 overt visual attention. *J Eye Mov Res* 1(2):4.
- 556 7. Schall S, Quigley C, Onat S, König P (2009) Visual stimulus locking of EEG is modulated  
557 by temporal congruency of auditory stimuli. *Exp Brain Res* 198(2-3):137–51.
- 558 8. Hollensteiner KJ, Pieper F, Engler G, König P, Engel AK (2015) Crossmodal integration  
559 improves sensory detection thresholds in the ferret. *PLoS One* 10(5):e0124952.
- 560 9. Ernst MO, Banks MS (2002) Humans integrate visual and haptic information in a  
561 statistically optimal fashion. *Nature* 415(6870):429–33.
- 562 10. Alais D, Burr D (2004) The ventriloquist effect results from near-optimal bimodal  
563 integration. *Curr Biol* 14(3):257–262.
- 564 11. Körding KP, Wolpert DM (2004) Bayesian integration in sensorimotor learning. *Nature*  
565 427(6971):244–247.

- 566 12. Tickle H, Speekenbrink M, Tsetsos K, Michael E, Summerfield C (2016) Near-optimal  
567 integration of magnitude in the human parietal cortex. *J Cogn Neurosci* 28(4):589–603.
- 568 13. Gu Y, Angelaki DE, Deangelis GC (2008) Neural correlates of multisensory cue  
569 integration in macaque MSTd. *Nat Neurosci* 11(10):1201–10.
- 570 14. Fetsch CR, Pouget A, DeAngelis GC, Angelaki DE (2012) Neural correlates of reliability-  
571 based cue weighting during multisensory integration. *Nat Neurosci* 15(1):146–154.
- 572 15. Heekeren HR, Marrett S, Bandettini PA, Ungerleider LG (2004) A general mechanism for  
573 perceptual decision-making in the human brain. *Nature* 431(7010):859–862.
- 574 16. Bankó EM, Gál V, Körtvélyes J, Kovács G, Vidnyánszky Z (2011) Dissociating the effect  
575 of noise on sensory processing and overall decision difficulty. *J Neurosci* 31(7):2663–  
576 2674.
- 577 17. Tassinari H, Hudson TE, Landy MS (2006) Combining priors and noisy visual cues in a  
578 rapid pointing task. *J Neurosci* 26(40):10154–10163.
- 579 18. Ehinger B V., Konig P, Ossandon JP (2015) Predictions of visual content across eye  
580 novements and their modulation by inferred information. *J Neurosci* 35(19):7403–7413.
- 581 19. Tong F, Engel S (2001) Interocular rivalry revealed in the human cortical blind-spot  
582 representation. *Nature* 411(6834):195–9.
- 583 20. Fahle M, Schmid M (1988) Naso-temporal asymmetry of visual perception and of the  
584 visual cortex. *Vision Res* 28(2):293–300.
- 585 21. Curcio CA, Sloan KR, Kalina RE, Hendrickson AE (1990) Human photoreceptor  
586 topography. *J Comp Neurol* 292(4):497–523.
- 587 22. Rovamo J, Virsu V, Laurinen P, Hyvärinen L (1982) Resolution of gratings oriented along  
588 and across meridians in peripheral vision. *Invest Ophthalmol Vis Sci* 23(5):666–670.
- 589 23. Pöppel E, Held R, Frost D (1973) Residual visual function after brain wounds involving  
590 the central visual pathways in man. *Nature* 243(5405):295–296.
- 591 24. Paradiso MA, Carney T (1988) Orientation discrimination as a function of stimulus

- 592 eccentricity and size: nasal/temporal retinal asymmetry. *Vision Res* 28(8):867–874.
- 593 25. Crossland MD, Bex PJ (2009) Spatial alignment over retinal scotomas. *Invest Ophthalmol*  
594 *Vis Sci* 50(3):1464–1469.
- 595 26. Friston K, Kilner J, Harrison L (2006) A free energy principle for the brain. *J Physiol Paris*  
596 100(1-3):70–87.
- 597 27. Friston K, Adams R a, Perrinet L, Breakspear M (2012) Perceptions as hypotheses:  
598 saccades as experiments. *Front Psychol* 3(May):151.
- 599 28. Summerfield C, de Lange FP (2014) Expectation in perceptual decision making: neural  
600 and computational mechanisms. *Nat Rev Neurosci* (October). doi:10.1038/nrn3838.
- 601 29. Kok P, Bains LJ, van Mourik T, Norris DG, de Lange FP (2016) Selective Activation of the  
602 Deep Layers of the Human Primary Visual Cortex by Top-Down Feedback. *Curr Biol*  
603 26(3):371–376.
- 604 30. Komatsu H (2006) The neural mechanisms of perceptual filling-in. *Nat Rev Neurosci*  
605 7(3):220–31.
- 606 31. Brainard DH (1997) The psychophysics toolbox. *Spat Vis* 10(4):433–436.
- 607 32. Cornelissen FW, Peters EM, Palmer J (2002) The eyelink toolbox: eye tracking with  
608 MATLAB and the psychophysics toolbox. *Behav Res Methods, Instruments, Comput*  
609 34(4):613–617.
- 610 33. Awater H (2005) Cortical representation of space around the blind spot. *J Neurophysiol*  
611 94(5):3314–3324.
- 612 34. Wilcox RR (2012) *Introduction to Robust Estimation and Hypothesis Testing* (Academic  
613 Press). 3rd Editio.
- 614 35. Wolf E, Morandi A (1962) Retinal sensitivity in the region of the blind spot. *JOSA*  
615 52(11):806–812.
- 616 36. Sorensen T, Vasishth S (2015) Bayesian linear mixed models using stan: a tutorial for  
617 psychologists, linguists, and cognitive scientists. *bioRxiv*:30.

- 618 37. Carpenter B, et al. (2016) Stan: a probabilistic programming language. *J Stat Softw In*  
619 Press.
- 620 38. Gelman A, Hwang J, Vehtari A (2014) Understanding predictive information criteria for  
621 Bayesian models. *Stat Comput* 24(6):997–1016.
- 622

623 **ACKNOWLEDGEMENTS**

624 We thank Tim C. Kietzmann for his valuable suggestions on the design of the experiment and  
625 Frank Jäkel for his valuable discussions of the analysis. This work was supported by SPP 1665,  
626 the European Union through the H2020 FET Proactive project socSMCs (GA no 641321) and  
627 SFB 936, project B1.

628

629

630

631 **SUPPLEMENTARY**

632

633

| Parameter        | Experiment 1<br>(95% CDI) | Experiment 2<br>(95% CDI) | Experiment 3<br>(95% CDI) | All Experiments<br>(95% CDI) |
|------------------|---------------------------|---------------------------|---------------------------|------------------------------|
| Location BS      | 15.01%<br>[8.49%,21.08%]  | 12.50%<br>[7.35%,17.49%]  | 13.18%<br>[6.47%,19.64%]  | 13.44%<br>[9.94%,16.70%]     |
| Location above   |                           | 6.63%<br>[0.77%,12.30%]   |                           | 6.73%<br>[1.91%,11.31%]      |
| Location outward |                           |                           | 4.80%<br>[0.58%,8.89%]    | 4.84%<br>[0.75%,8.79%]       |
| Location inward  |                           |                           | 2.85% [-<br>1.10%,6.65%]  | 2.89%<br>[-1.03%,6.63%]      |
| BS - above       |                           | 6.11%<br>[1.16%,10.78%]   |                           | 6.97%<br>[1.69%,12.24%]      |
| BS - outward     |                           |                           | 8.61%<br>[0.98%,16.04%]   | 8.86%<br>[3.73%,13.52%]      |
| BS - inward      |                           |                           | 10.51%<br>[3.55%,17.29%]  | 10.74%<br>[6.15%,15.09%]     |

634 **Table 1:** Overview of the results of all experiments individually and the combined estimates.

635 Empty cells indicate that the condition was not measured in this study.
